# Supplementary material for: The Epigenetic Landscape of Latent Kaposi Sarcoma-Associated Herpesvirus Genomes
Source: PubMed Central journal article supplement (PMC2880564; doi:10.1371/journal.ppat.1000935), 2010-06-03
Supplement: ppat.1000935.s005.pdf [file ppat.1000935.s005.pdf]

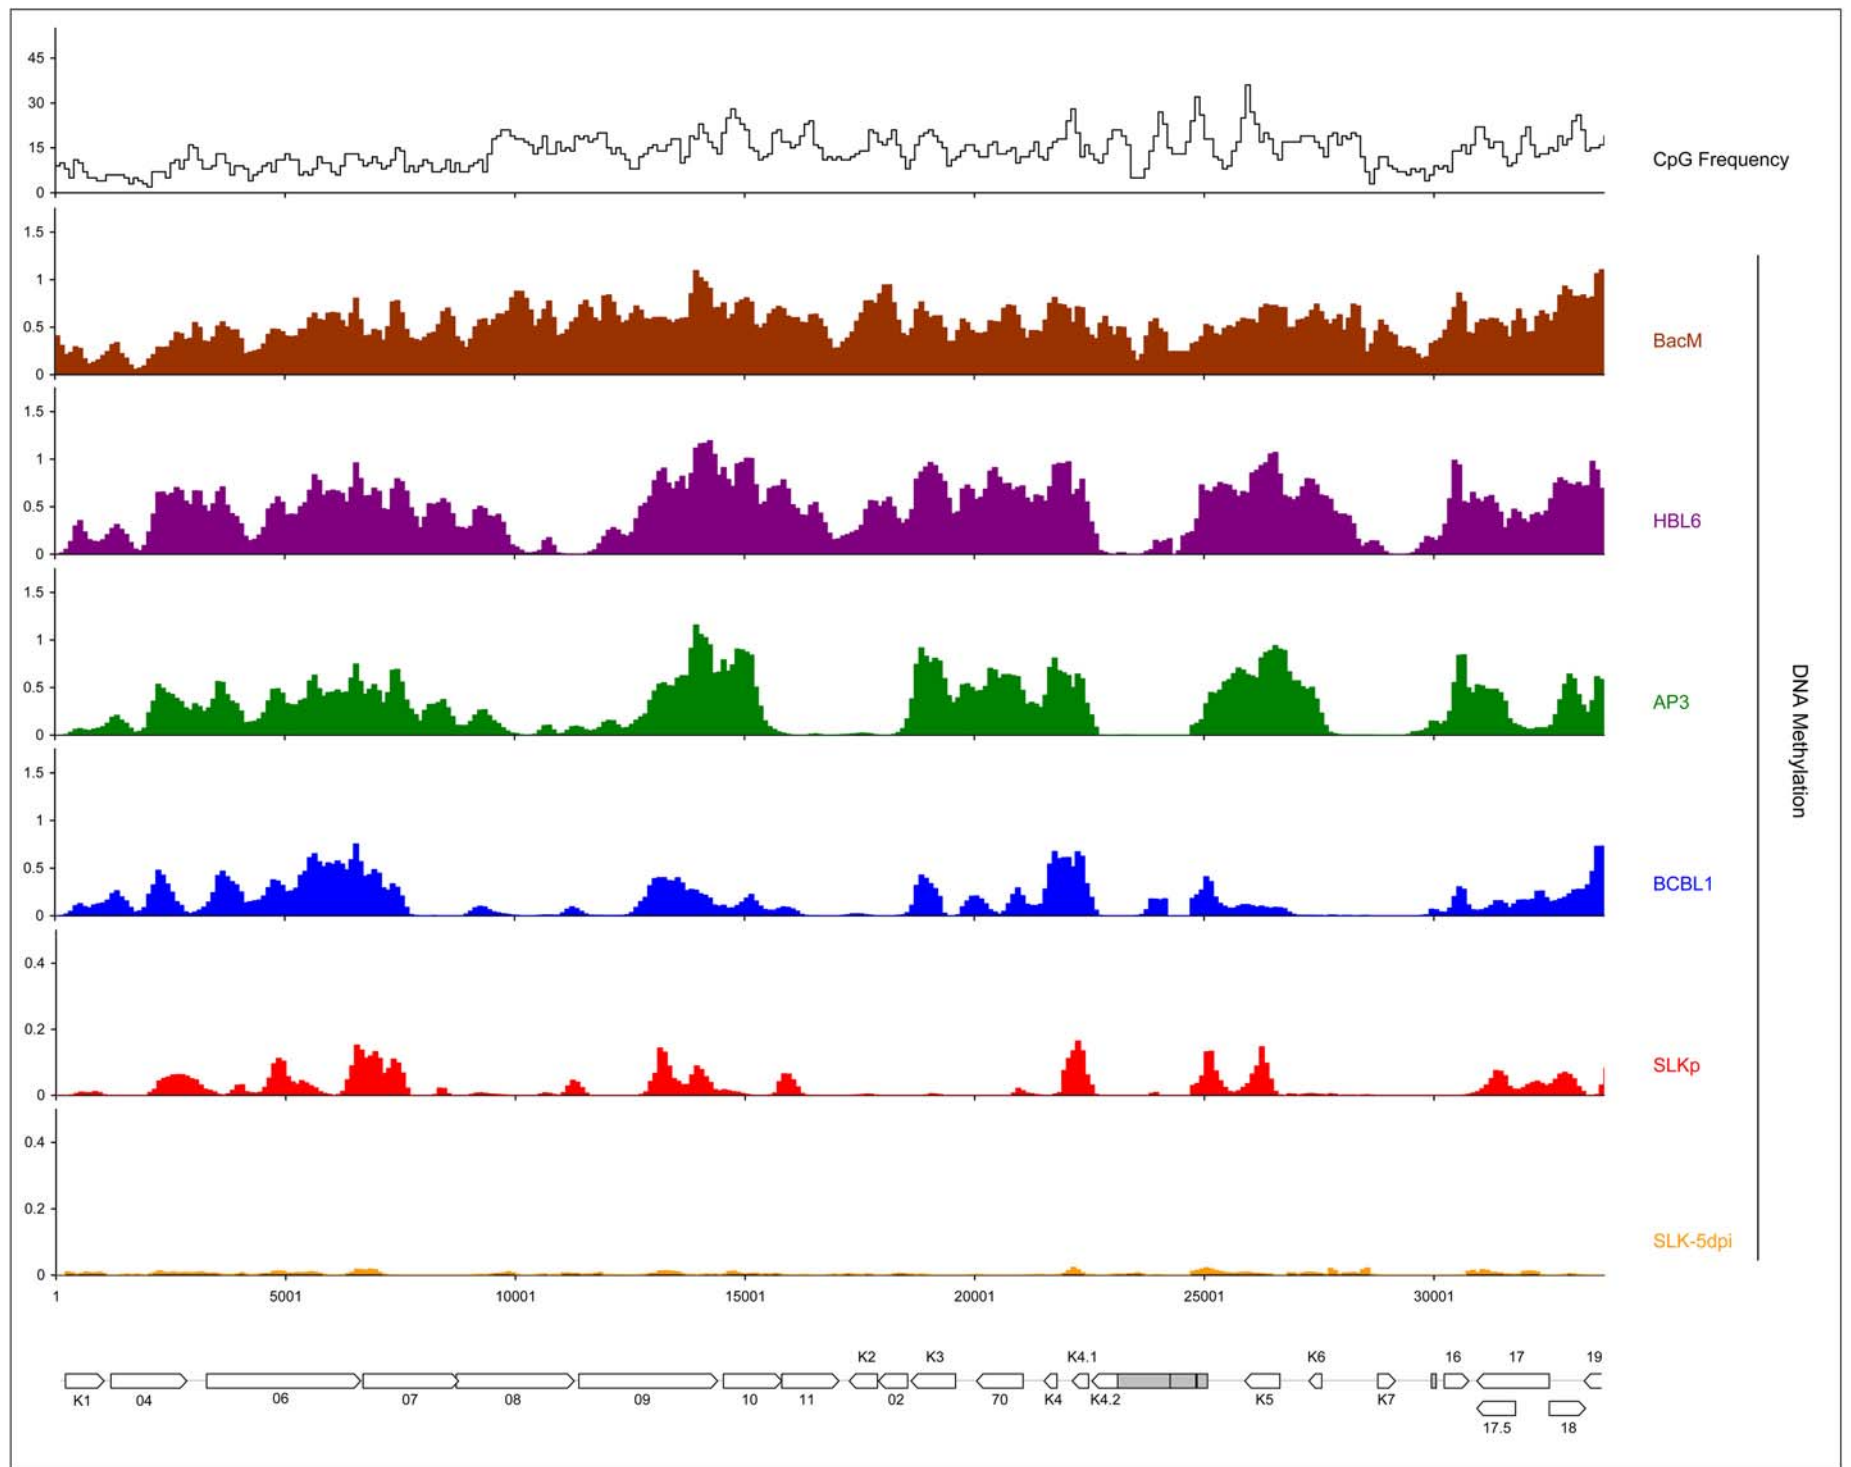

Figure S1

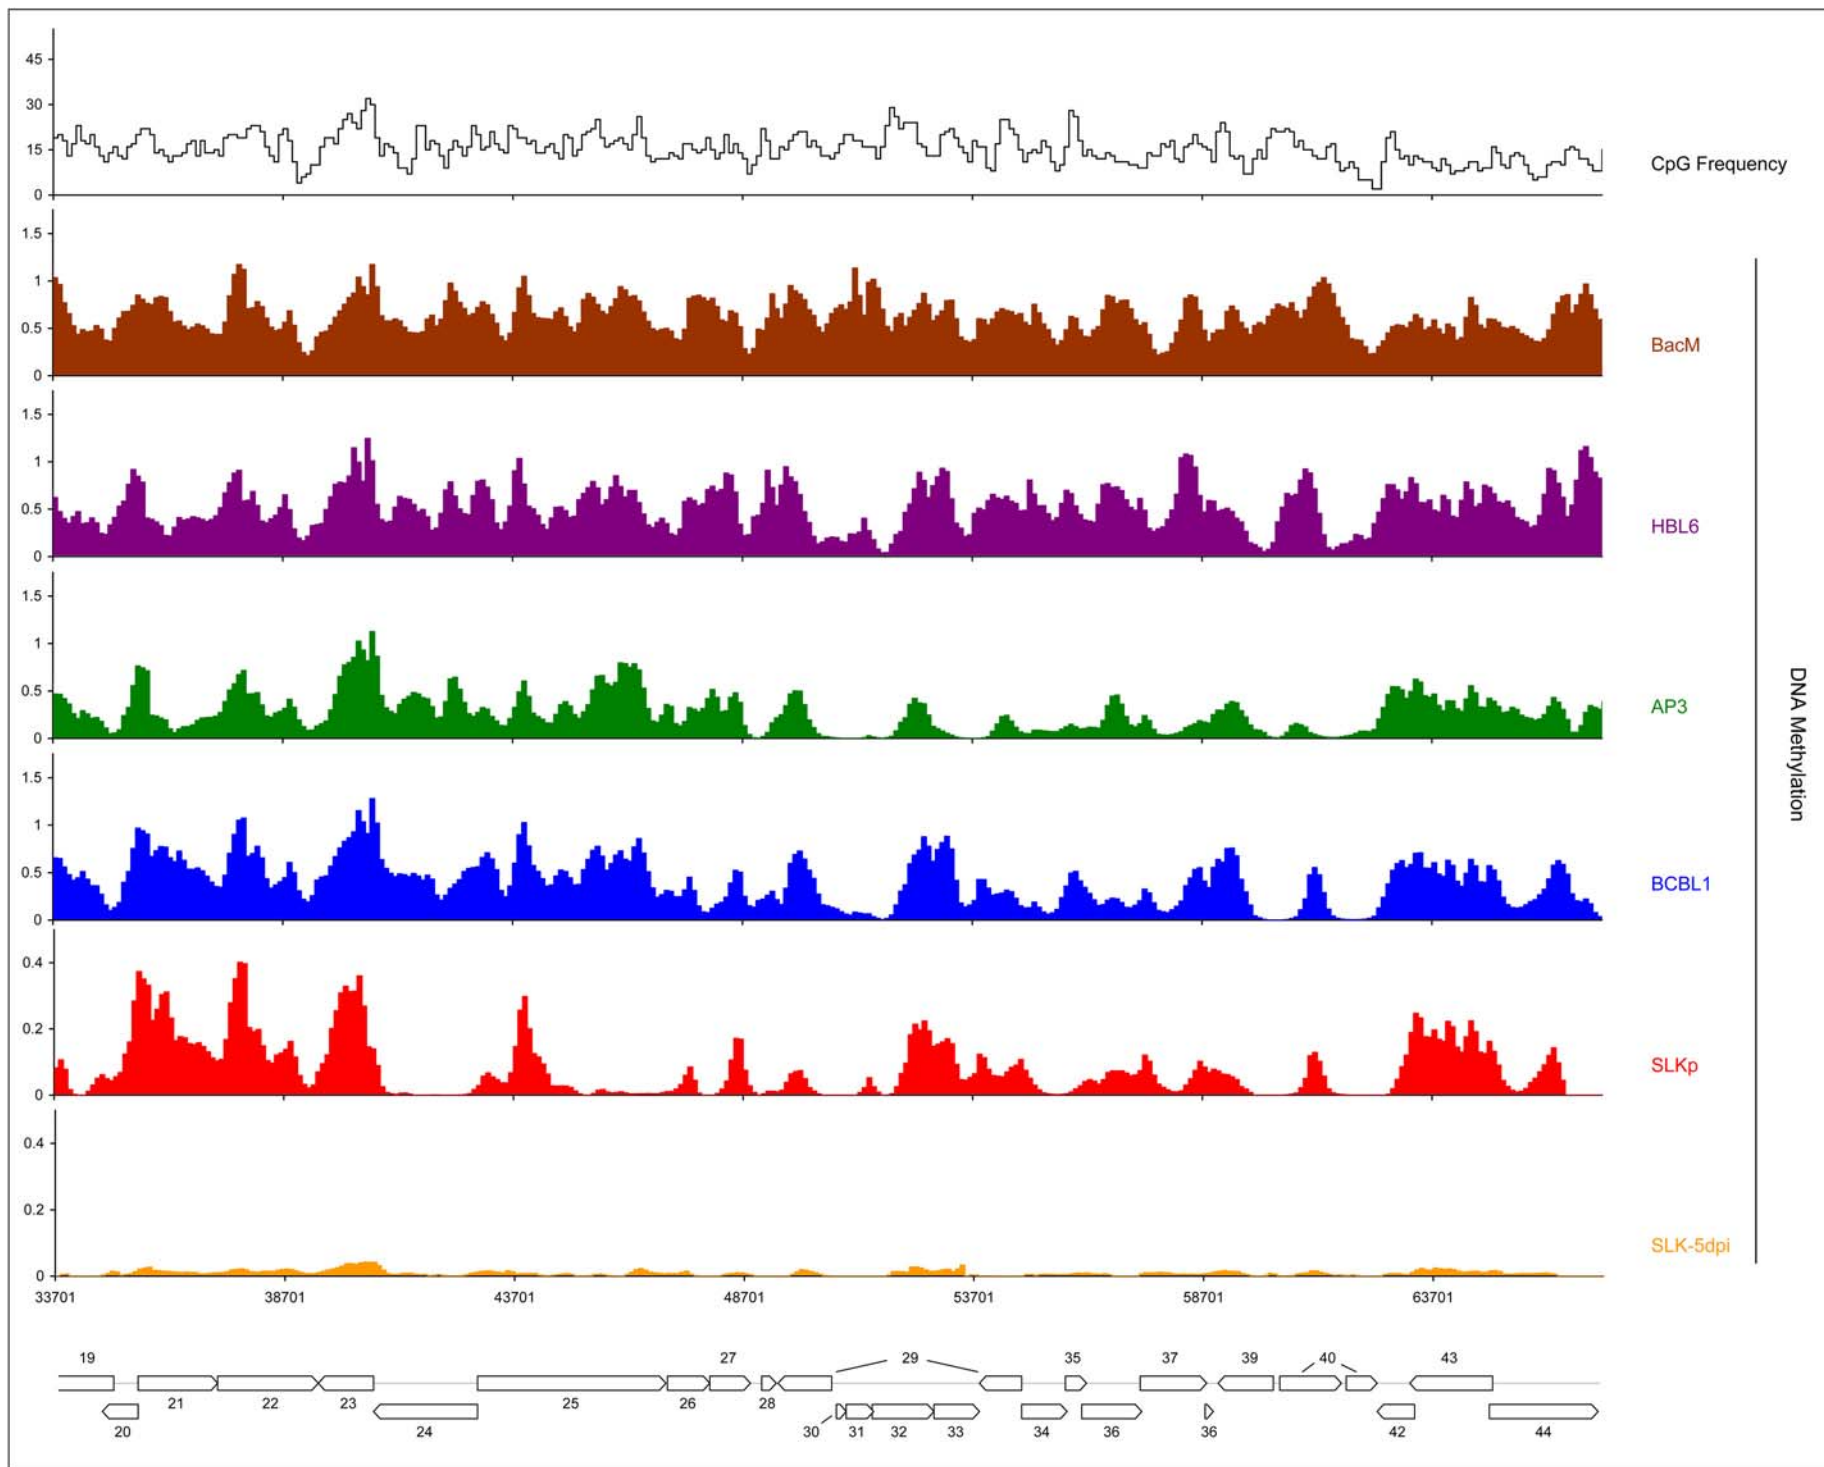

Figure S1, contn'd

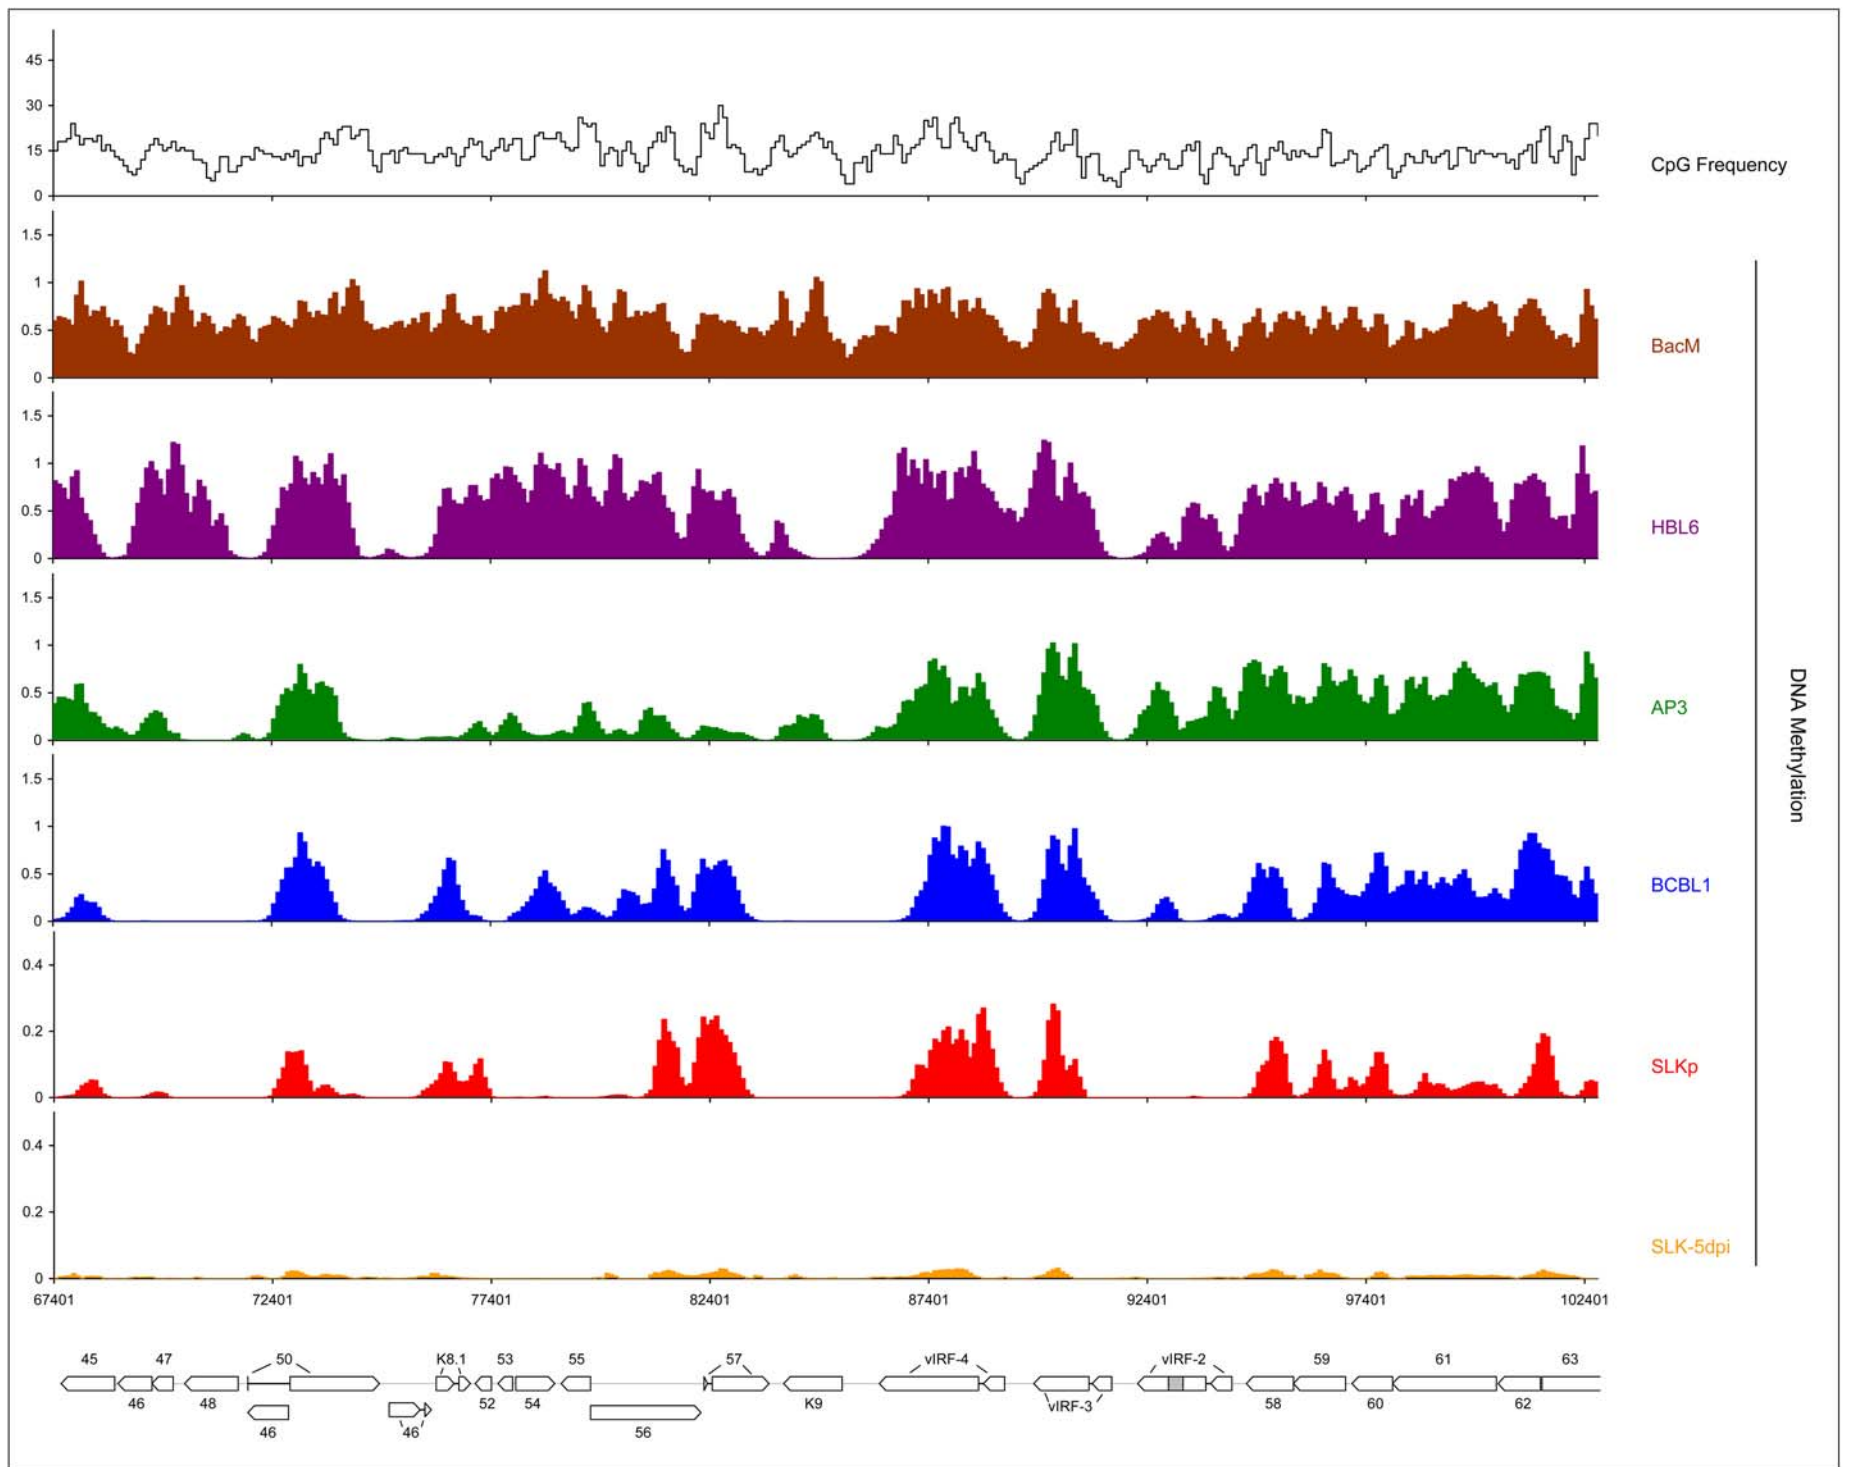

Figure S1, contn'd

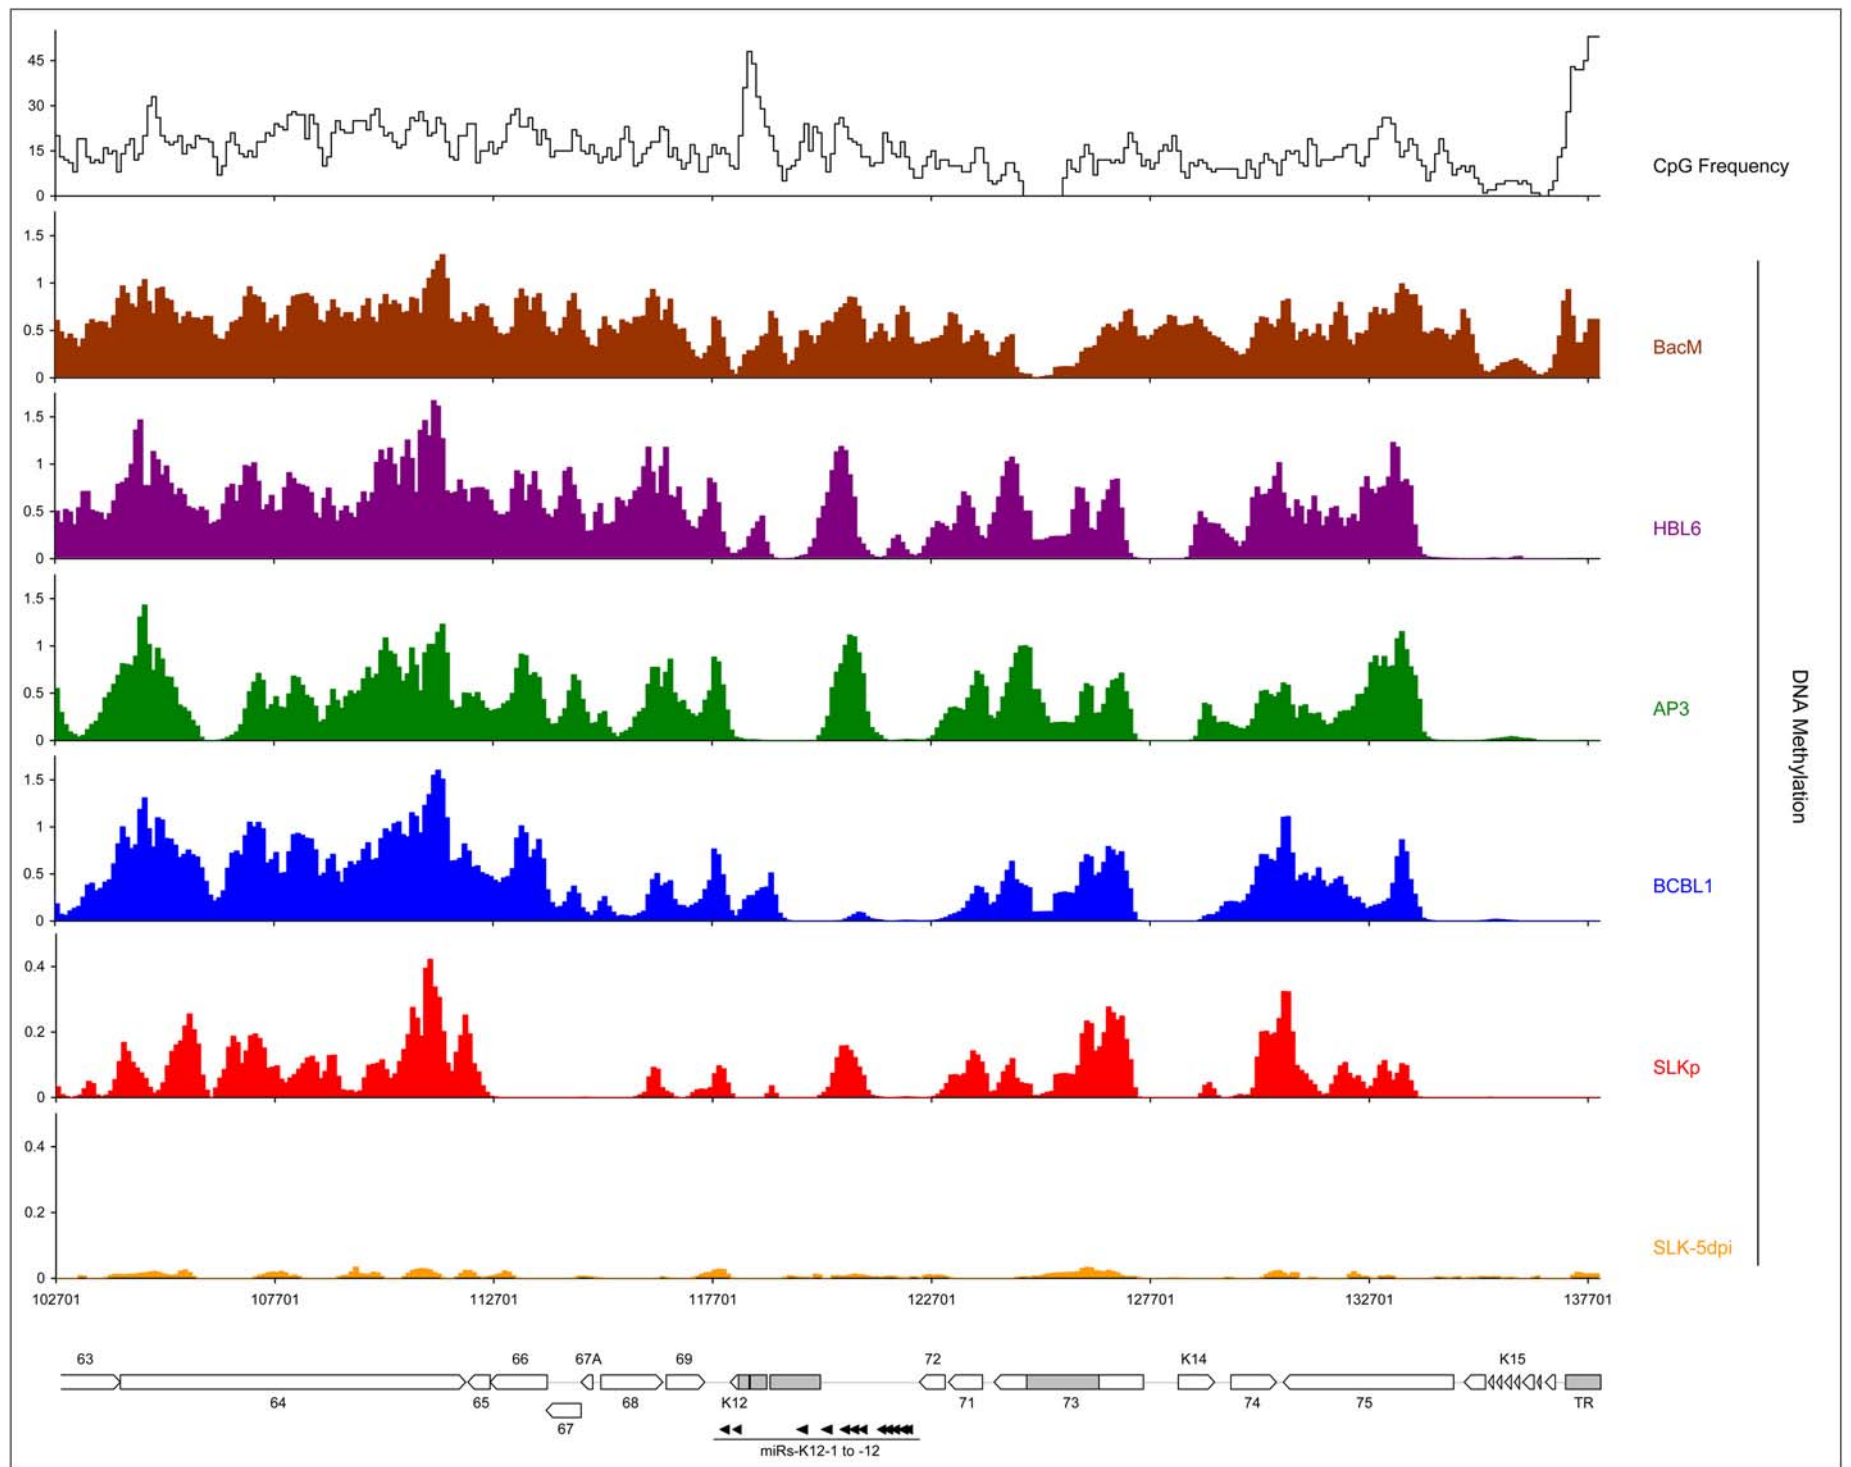

Figure S1, contn'd
